# Supplementary material for: Transition metal-doped MgO nanoparticles for nutrient recycling: an alternate Mg source for struvite synthesis from wastewater
Source: Royal Society of Chemistry journal article supplement (doi:10.1039/d0en00660b), 2020-01-01
Supplement: d0en00660b1.pdf [file d0en00660b1.pdf]

**Transition Metal Doped MgO Nanoparticles for Nutrient Recycling: An Alternate Mg  
Source for Struvite Synthesis from Wastewater**

Manoj Silva,<sup>1</sup> Vadim Murzin,<sup>2</sup> Lihua Zhang,<sup>3</sup> John Baltrus,<sup>4</sup> and Jonas Baltrusaitis<sup>1,\*</sup>

<sup>1</sup>Department of Chemical and Biomolecular Engineering, Lehigh University, B336 Iacocca Hall,  
111 Research Drive, Bethlehem, PA 18015, USA

<sup>2</sup>Deutsch Elektronen Synchrotron DESY, D-22607 Hamburg, Germany

<sup>3</sup>Brookhaven National Laboratory, Center for Functional Nanomaterials, Upton, NY 11973, USA

<sup>4</sup>National Energy Technology Laboratory, U.S. Department of Energy, 626 Cochrans Mill Road,  
Pittsburgh, PA 15236, USA

\*Corresponding author: [job314@lehigh.edu](mailto:job314@lehigh.edu), phone +1-610-758-6836

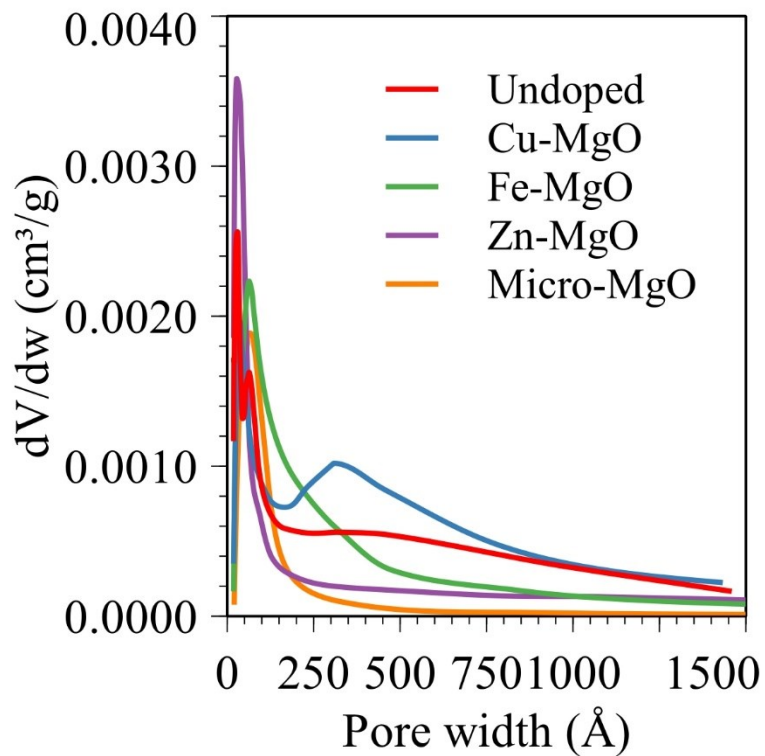

Figure S1. Pore size distributions for MgO NPs and microcrystalline MgO.

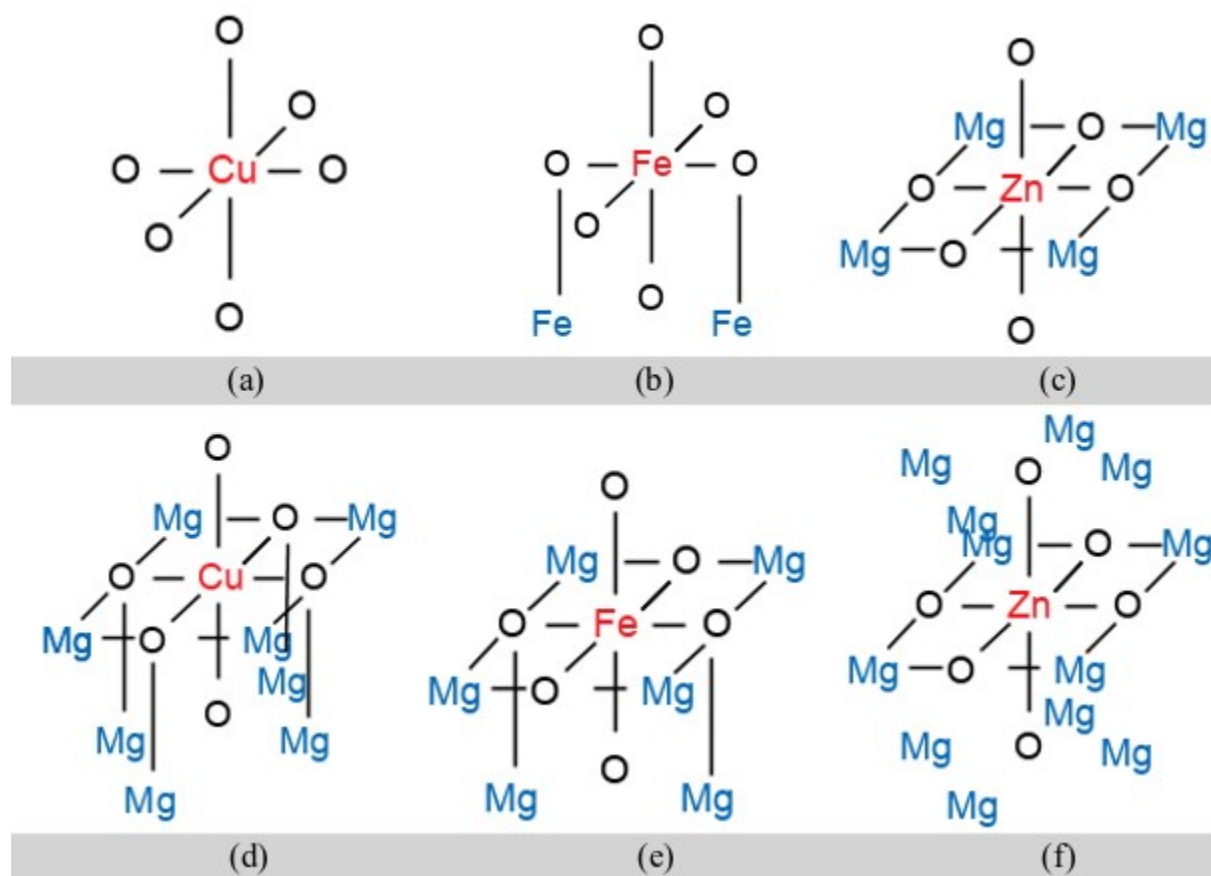

Figure S2. Models used for EXAFS fitting

Table S1. Adsorption kinetic model fits for undoped and doped MgO with varying temperatures and time ranges.

| Model                   | Sample Name         | Time Range (min) | Temperature (°C) | Parameters                           |                                                        | R <sup>2</sup> |       |
|-------------------------|---------------------|------------------|------------------|--------------------------------------|--------------------------------------------------------|----------------|-------|
| Pseudo-second Order     | Undoped             | 0-35             | 25               | q <sub>e</sub> (mg g <sup>-1</sup> ) | k <sub>2</sub> (g mg <sup>-1</sup> min <sup>-1</sup> ) | 0.992          |       |
|                         |                     |                  | 35               | 1666.67                              | 9.00E-04                                               | 0.998          |       |
|                         |                     |                  | 45               | 1428.57                              | 7.00E-04                                               | 0.999          |       |
|                         | Cu-MgO              |                  | 25               | 1428.57                              | 1.75E-04                                               | 0.973          |       |
|                         |                     |                  | 35               | 1428.57                              | 2.33E-04                                               | 0.983          |       |
|                         |                     |                  | 45               | 1250.00                              | 3.20E-04                                               | 0.989          |       |
|                         | Fe-MgO              |                  | 25               | 1666.67                              | 2.43E-05                                               | 0.289          |       |
|                         |                     |                  | 35               | 3333.33                              | 4.48E-06                                               | 0.046          |       |
|                         |                     |                  | 45               | 1666.67                              | 1.90E-04                                               | 0.301          |       |
|                         | Pseudo-second order |                  | Zn-MgO           | 25                                   | 1111.11                                                | 1.45E-04       | 0.894 |
|                         |                     |                  |                  | 35                                   | 5000.00                                                | 1.06E-06       | 0.010 |
|                         |                     |                  |                  | 45                                   | 1250.00                                                | 3.20E-04       | 0.989 |
| Undoped                 |                     | 25               | 1428.57          | 2.45E-03                             | 0.971                                                  |                |       |
|                         |                     | 35               | 1250.00          | 2.13E-03                             | 0.964                                                  |                |       |
|                         |                     | 45               | 1111.11          | 2.70E-03                             | 0.971                                                  |                |       |
| Cu-MgO                  | 833.33              | 1.03E-03         | 0.806            |                                      |                                                        |                |       |
|                         | Fe-MgO              | 77.52            | 6.66E-02         | 0.102                                |                                                        |                |       |
|                         |                     | Zn-MgO           | 217.39           | 8.46E-03                             | 0.246                                                  |                |       |
| Intraparticle diffusion |                     |                  | 0-5              | 25                                   | k <sub>p</sub>                                         | C              |       |
|                         | Undoped             |                  |                  |                                      | 618.25                                                 | 31.928         | 0.988 |
|                         | Cu-MgO              | 354.72           |                  |                                      | 7.064                                                  | 0.998          |       |
|                         | Fe-MgO              | 134.40           |                  |                                      | 30.435                                                 | 0.815          |       |
|                         | Zn-MgO              | 142.53           |                  |                                      | 6.908                                                  | 0.990          |       |
| Microcrystalline MgO    | 177.43              | 64.766           | 0.884            |                                      |                                                        |                |       |

Table S2. Structural parameters (obtained from the fittings of K-edge EXAFS data) of the first two coordination shells around the dopant metal atom centers. The errors for R and  $\sigma^2$  are within parentheses.

| Sample name | Bond       | N  | R(Å)         | $\sigma^2(\text{Å}^2)$ |
|-------------|------------|----|--------------|------------------------|
| Cu-MgO      | Cu-O (eq.) | 4  | 2.03 (.01)   | .0080 (.0013)          |
|             | Cu-O (ax.) | 2  | 2.31 (.03)   | .0081 (.0035)          |
|             | Cu-Mg(Cu)  | 8  | 2.96 (.02)   | .0095 (.0011)          |
| Fe-MgO      | Fe-O       | 6  | 1.95 (.0008) | .0113 (.0006)          |
|             | Fe-Mg(Fe)  | 6  | 2.98 (.011)  | .0087 (.0007)          |
| Zn-MgO      | Zn-O       | 6  | 2.12 (.015)  | .0075 (.0018)          |
|             | Zn-Mg(Zn)  | 12 | 3.00 (.015)  | .0066 (.0011)          |
| Cu-Struvite | Cu-O (eq.) | 4  | 1.96 (.010)  | .0058 (.0005)          |
|             | Cu-O (ax.) | 2  | 2.3 (0.1)    | .035 (.016)            |
| Fe-Struvite | Fe-O       | 6  | 1.97 (.004)  | .0093 (.0002)          |
|             | Fe-Mg(Fe)  | 2  | 3.05 (.007)  | .0127 (.0009)          |
| Zn-Struvite | Zn-O       | 6  | 1.98 (.024)  | .0123 (.0014)          |
|             | Zn-Mg(Zn)  | 4  | 2.95 (.030)  | .0101 (.0027)          |

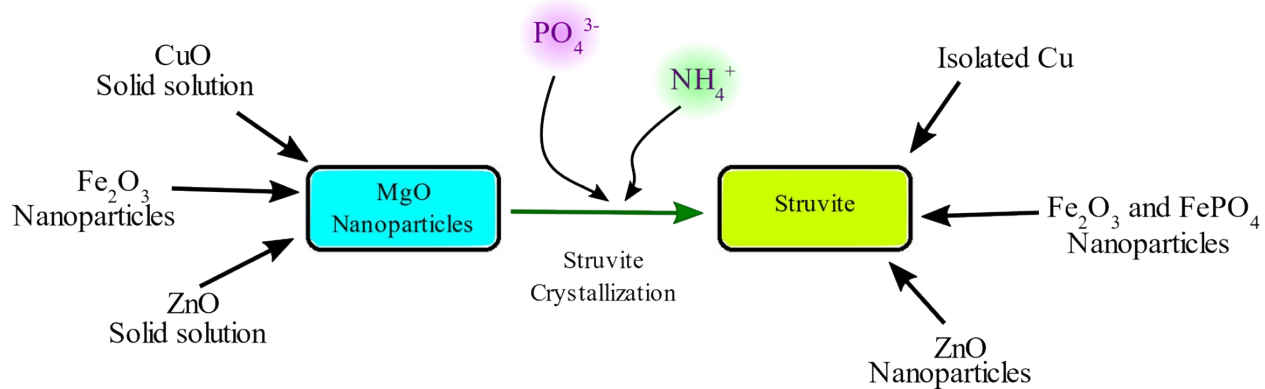

Figure S3. Summary of reaction process and fate of the dopants in MgO.
